# Supplementary material for: Taxonomic and Functional Responses of Soil Microbial Communities to Annual Removal of Aboveground Plant Biomass
Source: PubMed Central journal article supplement (PMC5990867; doi:10.3389/fmicb.2018.00954), 2018-05-31
Supplement: Table_1.pdf [file Table_1.pdf]

**Table S1.** Soil geochemical variables, plant biomass and soil respirations under control and clipping in each year<sup>[1]</sup>.

|                                             | 2010       |                   | 2011        |                   | 2012       |                   | 2013       |                   | 2014       |                   |
|---------------------------------------------|------------|-------------------|-------------|-------------------|------------|-------------------|------------|-------------------|------------|-------------------|
|                                             | Control    | Clipping          | Control     | Clipping          | Control    | Clipping          | Control    | Clipping          | Control    | Clipping          |
| NO <sub>3</sub> <sup>-</sup> -N (mg/kg)     | 3.02±1.41  | 2.51±0.42         | 37.41±12.46 | 41.33±6.30        | 22.48±3.43 | <b>7.84±3.71</b>  | 3.79±0.94  | <b>1.43±0.38</b>  | 13.48±0.36 | <b>2.78±1.31</b>  |
| NH <sub>4</sub> <sup>+</sup> -N (mg/kg)     | 3.32±0.53  | 3.96±0.36         | 2.84±0.45   | 2.96±0.19         | 4.85±0.78  | 3.46±0.07         | 2.99±0.18  | 3.70±0.58         | 4.99±1.59  | 3.43±0.37         |
| TN (%)                                      | 0.08±0.01  | <b>0.09±0.01</b>  | 0.10±0.02   | 0.12±0.02         | 0.11±0.01  | 0.08±0.01         | 0.10±0.01  | 0.11±0.01         | 0.10±0.01  | 0.09±0.01         |
| TOC (%)                                     | 0.73±0.10  | <b>0.87±0.12</b>  | 0.90±0.21   | 1.13±0.21         | 1.09±0.21  | 0.73±0.08         | 0.90±0.09  | 1.00±0.17         | 0.95±0.17  | 0.78±0.09         |
| Soil pH                                     | 6.39±0.09  | 6.51±0.12         | 5.98±0.11   | 5.93±0.06         | 6.08±0.10  | <b>6.33±0.06</b>  | 6.28±0.05  | 6.27±0.08         | 5.95±0.06  | 6.14±0.12         |
| Soil W (m <sup>3</sup> m <sup>-3</sup> )    | 6.74±0.21  | <b>5.60±0.20</b>  | 6.74±0.21   | <b>5.60±0.22</b>  | 6.36±1.43  | 6.20±1.68         | 4.32±0.89  | 3.84±0.45         | 3.54±0.64  | 4.56±0.61         |
| Soil T (°C)                                 | 16.16±0.21 | <b>16.84±0.21</b> | 18.29±0.25  | <b>18.91±0.26</b> | 18.53±0.22 | <b>18.73±0.21</b> | 16.43±0.20 | <b>16.63±0.19</b> | 17.25±0.10 | <b>17.65±0.10</b> |
| C <sub>3</sub> biomass (g m <sup>-2</sup> ) | 451±57     | 448±96            | 180±12      | 157±22            | 234±35     | 294±46            | 106±45     | 283±89            | 20±7       | 6±9               |
| C <sub>4</sub> biomass (g m <sup>-2</sup> ) | 110±25     | <b>36±13</b>      | 72±3        | 82±14             | 49±44      | 50±37             | 57±25      | 100±40            | 107±23     | <b>196±31</b>     |
| Total biomass (g m <sup>-2</sup> )          | 561±39     | 484±89            | 252±10      | 239±8             | 283±20     | 344±69            | 163±35     | <b>384±66</b>     | 128±26     | <b>203±36</b>     |
| Plant richness                              | 4.50±1.32  | 5.50±0.86         | 6.00±0.58   | 4.75±0.48         | 3.50±0.50  | <b>6.00±0.57</b>  | 5.00±0.71  | 6.00±1.08         | 3.75±0.48  | 4.75±0.85         |
| HR (μmol m <sup>-2</sup> s <sup>-1</sup> )  | 2.00±0.19  | 2.22±0.20         | 0.91±0.17   | 0.58±0.16         | 0.79±0.08  | 0.90±0.11         | 1.41±0.21  | <b>1.13±0.14</b>  | 1.35±0.21  | <b>1.9±0.42</b>   |
| AR (μmol m <sup>-2</sup> s <sup>-1</sup> )  | 1.23±0.18  | <b>1.92±0.27</b>  | 2.18±0.51   | 3.36±0.94         | 2.13±0.19  | 2.00±0.23         | 1.71±0.25  | 1.92±0.26         | 0.34±0.15  | 0.11±0.25         |
| TR (μmol m <sup>-2</sup> s <sup>-1</sup> )  | 3.23±0.27  | <b>4.14±0.31</b>  | 3.10±0.52   | 3.96±0.94         | 2.92±0.23  | 2.90±0.27         | 3.12±0.30  | 3.04±0.33         | 1.69±0.24  | <b>1.90±0.42</b>  |

<sup>[1]</sup> The variables were compared between clipping and control in each year. Those significantly ( $P < 0.05$ ) changed were indicated in boldface.

NO<sub>3</sub><sup>-</sup>-N: soil nitrate nitrogen; NH<sub>4</sub><sup>+</sup>-N: soil ammonium nitrogen; TN: soil total nitrogen; TOC: soil total organic carbon; Soil W: soil water content; Soil T: soil temperature; HR: soil heterotrophic respiration; AR: soil autotrophic respiration; TR: soil total respiration.
