# Supplementary material for: Taxonomic and Functional Responses of Soil Microbial Communities to Annual Removal of Aboveground Plant Biomass
Source: PubMed Central journal article supplement (PMC5990867; doi:10.3389/fmicb.2018.00954), 2018-05-31
Supplement: Table_2.pdf [file Table_2.pdf]

**Table S2.** The overall microbial community diversity under clipping and control detected by ITS and 16S rRNA gene sequencing data and GeoChip data<sup>[1]</sup>.

|                | RichnessOTU | Shannon index | Simpson index   | Evenness    |
|----------------|-------------|---------------|-----------------|-------------|
| <b>16S</b>     |             |               |                 |             |
| 2010 Clipping  | 5753±288    | 6.86±0.26     | 131.96±85.94    | 0.79±0.03   |
| 2010 Control   | 6350±204    | 7.41±0.13     | 283.00±57.90    | 0.85±0.01   |
| 2011 Clipping  | 5363±182    | 7.21±0.12     | 324.31±94.64    | 0.84±0.01   |
| 2011 Control   | 5349±223    | 7.09±0.19     | 262.48±72.74    | 0.83±0.02   |
| 2012 Clipping  | 4888±221*   | 6.80±0.15     | 137.40±47.31    | 0.80±0.01   |
| 2012 Control   | 5120±207    | 6.94±0.09     | 136.86±31.05    | 0.81±0.01   |
| 2013 Clipping  | 5922±298    | 7.41±0.12     | 356.88±80.99    | 0.85±0.01   |
| 2013 Control   | 5971±260    | 7.29±0.17     | 252.43±85.99    | 0.84±0.02   |
| 2014 Clipping  | 5588±441    | 7.18±0.28     | 270.11±76.96    | 0.83±0.03   |
| 2014 Control   | 5429±114    | 7.27±0.02     | 293.48±26.63    | 0.85±0.01   |
| <b>ITS</b>     |             |               |                 |             |
| 2010 Clipping  | 263±75      | 2.30±0.65     | 7.55±4.76       | 0.41±0.09   |
| 2010 Control   | 390±51      | 3.49±0.28     | 12.80±2.68      | 0.59±0.04   |
| 2011 Clipping  | 383±52      | 3.45±0.51     | 14.67±4.81      | 0.58±0.08   |
| 2011 Control   | 394±49      | 3.43±0.31     | 11.19±2.87      | 0.5±0.04    |
| 2012 Clipping  | 328±42      | 2.69±0.42     | 6.83±3.69       | 0.46±0.06   |
| 2012 Control   | 345±63      | 3.41±0.27     | 11.50±1.59      | 0.59±0.03   |
| 2013 Clipping  | 409±48      | 3.39±0.38     | 13.46±4.61      | 0.56±0.06   |
| 2013 Control   | 392±42      | 3.37±0.39     | 13.06±5.35      | 0.56±0.06   |
| 2014 Clipping  | 279±38      | 2.53±0.59     | 7.02±6.49       | 0.44±0.09   |
| 2014 Control   | 386±28      | 3.19±0.36     | 9.40±6.90       | 0.53±0.06   |
| <b>GeoChip</b> |             |               |                 |             |
| 2010 Clipping  | 31291±1365* | 9.24±0.05*    | 3187.05±180.98* | 0.89±0.001  |
| 2010 Control   | 34436±793   | 9.32±0.03     | 3467.50±192.58  | 0.89±0.001  |
| 2011 Clipping  | 39967±274*  | 9.51±0.01     | 4494.90±69.90   | 0.90±0.001  |
| 2011 Control   | 36617±1119  | 9.42±0.05     | 4122.34±263.59  | 0.90±0.002  |
| 2012 Clipping  | 29176±913*  | 9.32±0.02*    | 3210.06±85.35*  | 0.91±0.002* |
| 2012 Control   | 38344±834   | 9.49±0.01     | 4093.37±60.17   | 0.90±0.001  |
| 2013 Clipping  | 41008±962#  | 9.54±0.02     | 4365.27±138.28# | 0.90±0.0004 |
| 2013 Control   | 39518±484   | 9.51±0.02     | 4170.67±98.20   | 0.90±0.001  |
| 2014 Clipping  | 3634±688*   | 9.46±0.02#    | 4072.88±107.60  | 0.90±0.001  |
| 2014 Control   | 34642±765   | 9.42±0.02     | 3851.06±91.37   | 0.90±0.001  |

<sup>[1]</sup> The differences between clipping and control in each year were tested by two-tailed paired *t*-tests, indicated by \* when  $P < 0.05$  or # when  $P < 0.10$ .
