# Supplementary material for: Taxonomic and Functional Responses of Soil Microbial Communities to Annual Removal of Aboveground Plant Biomass
Source: PubMed Central journal article supplement (PMC5990867; doi:10.3389/fmicb.2018.00954), 2018-05-31
Supplement: Table_3.pdf [file Table_3.pdf]

**Table S3.** The significance tests of bacterial and fungal lineages affected by clipping in different years by ANOVA<sup>[1]</sup>.

|                                 | 2010  | 2011 | 2012  | 2013 | 2014 |
|---------------------------------|-------|------|-------|------|------|
| <b>Bacteria</b>                 |       |      |       |      |      |
| <i>Acidobacteria</i>            | 2***  | 2**  | 3***  | 1    | 2    |
| <i>Actinobacteria</i>           | 11*** | 6    | 16*** | 3    | 4*** |
| <i>Alphaproteobacteria</i>      | 13    | 1    | 15*** | 7**  | 9*** |
| <i>Armatimonadetes</i>          | 0     | 0    | 0     | 2*   | 0*   |
| <i>Bacteroidetes</i>            | 3***  | 0    | 9***  | 2*   | 2    |
| <i>Betaproteobacteria</i>       | 1***  | 3    | 4     | 0    | 3    |
| <i>Chloroflexi</i>              | 2**   | 0**  | 0*    | 1    | 0*   |
| <i>Crenarchaeota</i>            | 0**   | 0    | 0     | 0    | 0*   |
| <i>CyanobacteriaChloroplast</i> | 1*    | 1    | 1     | 1    | 2    |
| <i>Deltaproteobacteria</i>      | 3**   | 2    | 2**   | 0**  | 5**  |
| <i>Euryarchaeota</i>            | 0     | 0    | 0     | 0    | 0    |
| <i>Firmicutes</i>               | 6     | 1    | 3**   | 1    | 6*   |
| <i>Gammaproteobacteria</i>      | 2*    | 0    | 3     | 1*   | 2*   |
| <i>Gemmatimonadetes</i>         | 0*    | 0    | 0     | 0    | 0*   |
| <i>Nitrospira</i>               | 0     | 0    | 0     | 0    | 1**  |
| <i>Planctomycetes</i>           | 3***  | 1    | 0***  | 0    | 3*** |
| <i>Verrucomicrobia</i>          | 4***  | 1*   | 1*    | 0    | 1    |
| <b>Fungi</b>                    |       |      |       |      |      |
| <i>Ascomycota</i>               | 6**   | 2    | 6**   | 3    | 6    |
| <i>Basidiomycota</i>            | 0     | 1    | 1     | 1    | 1    |
| <i>Chytridiomycota</i>          | 1     | 0    | 1     | 2    | 1*   |
| <i>Fungi_unidentified</i>       | 0     | 0    | 1*    | 0    | 0    |
| <i>Glomeromycota</i>            | 2***  | 0    | 1***  | 0    | 2*   |
| <i>Zygomycota</i>               | 0**   | 1    | 0     | 0    | 1*   |

<sup>[1]</sup> The number indicated the significantly ( $P < 0.05$ ) and marginally significantly ( $P < 0.10$ ) changed genera under clipping. The significance of different phyla was represented by \*\*\* when  $P < 0.001$ , \*\* when  $P < 0.01$  and \* when  $P < 0.05$ .
