# Supplementary material for: Taxonomic and Functional Responses of Soil Microbial Communities to Annual Removal of Aboveground Plant Biomass
Source: PubMed Central journal article supplement (PMC5990867; doi:10.3389/fmicb.2018.00954), 2018-05-31
Supplement: Table_4.pdf [file Table_4.pdf]

**Table S4.** The enzyme/protein encoded by the functional genes shown in figure 3, 4, S7, S8, S9 and S10.

| Gene category | Subcategory                      | Gene/enzyme name      | Phylogenetic group | Enzyme/ protein encoded          |                                |
|---------------|----------------------------------|-----------------------|--------------------|----------------------------------|--------------------------------|
| C fixation    | Calvin cycle                     | Rubisco               | Bacteria           | Ribulose biphosphate carboxylase |                                |
|               | Reductive acetyl-CoA pathway     | CODH                  | Bacteria           | Carbon monoxide dehydrogenase    |                                |
|               | 3-hydroxypropionate cycle        | PCC                   | Bacteria           | Propionyl-CoA carboxylase        |                                |
|               | Reverse tricarboxylic acid cycle | <i>aclB</i>           | Bacteria           | ATP citrate lyase beta subunit   |                                |
| C degradation | Starch                           | glucoamylase          | Bacteria/Fungi     | Glucoamylase                     |                                |
|               | Starch                           | <i>cda</i>            | Bacteria           | Cyclomaltodextrinase             |                                |
|               | Starch                           | <i>amyA</i>           | Bacteria           | Alpha-amylase                    |                                |
|               | Starch                           | <i>amyx</i>           | Bacteria           | Pullulanase                      |                                |
|               | Starch                           | <i>nplT</i>           | Bacteria           | Neopullulanase                   |                                |
|               | Starch                           | <i>apu</i>            | Bacteria           | Amylopullulanase                 |                                |
|               | Starch                           | isopullulanase        | Bacteria           | Isopullulanase                   |                                |
|               | Starch                           | <i>pulA</i>           | Bacteria           | Pullulanase                      |                                |
|               | Inulin                           | inulinase             | Bacteria/Fungi     | Inulinase                        |                                |
|               | Hemicellulose                    | xylanase              | Bacteria           | Xylanase                         |                                |
|               | Hemicellulose                    | mannanase             | Bacteria/Fungi     | Mannanase                        |                                |
|               | Hemicellulose                    | <i>xylA</i>           | Bacteria           | Xylose isomerase                 |                                |
|               | Hemicellulose                    | xylose isomerase      | Oomycetes          | Xylose isomerase                 |                                |
|               | Hemicellulose                    | <i>ara</i>            | Bacteria/Fungi     | Arabinofuranosidase              |                                |
|               | Lactose                          | lactase               | Fungi              | Lactase                          |                                |
|               | Pectin                           | pectinase             | Bacteria           | Pectinase                        |                                |
|               | Pectin                           | pectin lyase          | Oomycetes          | Pectin lyase                     |                                |
|               | Pectin                           | <i>pg</i>             | Oomycetes          | Polygalacturonase                |                                |
|               | Pectin                           | <i>pme</i>            | Fungi              | Pectin methylesterase            |                                |
|               | Pectin                           | <i>pec</i>            | Fungi              | Pectate lyase                    |                                |
|               | Pectin                           | <i>rgh</i>            | Bacteria/Fungi     | rhamnogalacturonase              |                                |
|               | Pectin                           | <i>pme</i>            | Bacteria           | Pectinesterase                   |                                |
|               | Pectin                           | exopolygalacturonase  | Fungi              | Exopolygalacturonase             |                                |
|               | Pectin                           | <i>rgaE</i>           | Bacteria/Fungi     | lipolytic enzyme                 |                                |
|               | Pectin                           | <i>rgl</i>            | Bacteria/Fungi     | Polysaccharide lyase             |                                |
|               | Pectin                           | pectate lyase         | Oomycetes          | Pectate lyase                    |                                |
|               | Pectin                           | endopolygalacturonase | Fungi              | Endopolygalacturonase            |                                |
|               | Cellulose                        | <i>axe</i>            | Fungi              | Acetyl xylan esterase            |                                |
|               | Cellulose                        | cellobiase            | Bacteria/Fungi     | Cellobiase                       |                                |
|               | Cellulose                        | endoglucanase         | Bacteria/Fungi     | Endoglucanase                    |                                |
|               | Cellulose                        | cellulase             | Parabasalia        | Cellulase                        |                                |
|               | Cellulose                        | exoglucanase          | Bacteria/Fungi     | Exoglucanase                     |                                |
|               | Phospholipids                    | phospholipase C       | Fungi              | Phospholipase subunit C          |                                |
|               | Phospholipids                    | phospholipase A2      | Fungi              | Phospholipase subunit A2         |                                |
|               | Phospholipids                    | phospholipase D       | Fungi              | Phospholipase subunit D          |                                |
|               | Camphor                          | camdcab               | Bacteria           | Camphor 5-monooxygenase          |                                |
|               | Terpenes                         |                       |                    | Bacteria                         | Limonene-1,2-epoxide hydrolase |
|               | Terpenes                         |                       | <i>lmeH</i>        |                                  |                                |
|               | Terpenes                         |                       |                    | Bacteria                         | Limonene 1,2-monooxygenase     |
|               | Terpenes                         |                       | <i>lmo</i>         |                                  |                                |

|           |                           |                       |                |                                           |
|-----------|---------------------------|-----------------------|----------------|-------------------------------------------|
|           | Terpenes                  | <i>cdh</i>            | Bacteria       | Carveol dehydrogenase                     |
|           | Cutin                     | cutinase              | Bacteria/Fungi | Cutinase                                  |
|           | Tannins                   | tannase               | Bacteria       |                                           |
|           | Chitin                    | acetylglucosaminidase | Bacteria/Fungi | Acetylglucosaminidase                     |
|           | Chitin                    | chitin deacetylase    | Fungi          | Chitin deacetylase                        |
|           | Chitin                    | chitinase             | Bacteria/Fungi | Chitinase                                 |
|           | Vanillin/Lignin           | <i>vanA</i>           | Bacteria       | Vanillate monooxygenase                   |
|           | Vanillin/Lignin           | <i>vdh</i>            | Bacteria/Fungi | Vanillin dehydrogenase                    |
|           | Vanillin/Lignin           | Phenol oxidase        | Bacteria/Fungi | Phenol oxidase                            |
|           | Vanillin/Lignin           | Ligninase             | Fungi          | Ligninase                                 |
|           | Vanillin/Lignin           | <i>glx</i>            | Bacteria/Fungi | glyoxal oxidase                           |
|           | Vanillin/Lignin           | <i>mnp</i>            | Fungi          | Manganese peroxidase                      |
|           | Ammonification            | <i>gdh</i>            | Bacteria/Fungi | Glutamate dehydrogenase                   |
|           | Ammonification            | <i>glnA</i>           | Fungi          | Glutamine synthetase                      |
|           | Ammonification            | <i>ureC</i>           | Bacteria       | Urease                                    |
|           | Anammox                   | <i>hzsA</i>           | Bacteria       | Hydrazine synthase                        |
|           | Anammox                   | <i>hzo</i>            | Bacteria       | Hydroxylamine oxidoreductase              |
|           | Assimilation              | Glutamine synthetase  | Protists       | Glutamine synthetase                      |
|           | Assimilation              | nitrate transporter   | Bacteria       | Nitrate transporter                       |
|           | Assimilation              | glutamate synthase    | Protists       | Glutamate synthase                        |
|           | Assimilation              | nitrite reductase     | Protists       | Nitrite reductase                         |
|           | Assimilation              | nitrite transporter   | algae          | Nitrite transporter                       |
|           | Assimilation              | ammonium transporter  | algae          | Ammonium transporter                      |
|           | Assimilatory N reduction  | <i>narB</i>           | Bacteria       | Nitrate reductase                         |
|           | Assimilatory N reduction  | <i>nir</i>            | Bacteria       | Nitrite reductase                         |
|           | Assimilatory N reduction  | <i>nirA</i>           | Bacteria       | Ferredoxin-nitrite reductase              |
|           | Assimilatory N reduction  | <i>nirB</i>           | Bacteria       | NADPH-nitrite reductase                   |
| N cycling | Assimilatory N reduction  | <i>nasA</i>           | Bacteria       | Nitrate reductase                         |
|           | Denitrification           | <i>norB</i>           | Bacteria       | Nitric-oxide reductase                    |
|           | Denitrification           | <i>nirK</i>           | Bacteria       | Nitrite reductase                         |
|           | Denitrification           | <i>nirS</i>           | Bacteria       | Nitrite reductase                         |
|           | Denitrification           | <i>cnorB</i>          | Bacteria       | Nitric oxide reductase subunit B          |
|           | Denitrification           | <i>nosZ</i>           | Bacteria       | Nitrous-oxide reductase                   |
|           | Denitrification           | <i>narG</i>           | Bacteria       | Membrane bound nitrate reductase          |
|           | Denitrification           |                       |                | Nitrite reductase subunit cytochrome c552 |
|           | Dissimilatory N reduction | <i>nrfA</i>           | Bacteria       | Periplasmic nitrate reductase             |
|           | Dissimilatory N reduction | <i>napA</i>           | Bacteria       | Nitrate reductase                         |
|           | N Assimilation            | Nitrate reductase     | Bacteria       | Ammonia monooxygenase                     |
|           | Nitrification             | <i>amoA</i>           | Bacteria       | Hydroxylamine oxidoreductase              |
|           | Nitrification             | <i>hao</i>            | Bacteria       | nitrogenase                               |
|           | Nitrogen fixation         | <i>nifH</i>           | Bacteria       |                                           |
|           | Phosphorus oxidation      | <i>htxA</i>           | Bacteria       | Phytanoyl-CoA dioxygenase                 |
|           | Phosphorus oxidation      | <i>ptxD</i>           | Bacteria       | Phosphonate dehydrogenase                 |
|           | Phytic acid hydrolysis    | Phytase               | Bacteria/Fungi | Phytase                                   |
|           | Polyphosphate degradation | <i>ppk2</i>           | Bacteria       | Polyphosphate kinase 2                    |

|                  |                              |            |          |                      |
|------------------|------------------------------|------------|----------|----------------------|
| P<br>utilization | Polyphosphate<br>degradation | <i>ppn</i> | Fungi    | Endopolyphosphatase  |
|                  | Polyphosphate<br>degradation | <i>ppx</i> | Bacteria | Exopolyphosphatase   |
|                  | Polyphosphate synthesis      | <i>ppk</i> | Bacteria | Polyphosphate kinase |

---
